# Supplementary material for: Evaluating use of mass-media communication intervention ‘MTV-Shuga’ on increased awareness and demand for HIV and sexual health services by adolescent girls and young women in South Africa: an observational study
Source: PubMed Central journal article supplement (PMC10201230; doi:10.1136/bmjopen-2022-062804), 2023-05-18
Supplement: bmjopen-2022-062804supp001.pdf [file bmjopen-2022-062804supp001.pdf]

**Supplementary Table 1 Exposure to MTV Shuga and PrEP awareness in the nested cohort of AGYW aged 13-22 (n=2184)**

|                                            | Unadjusted |            | Shuga adjusted |            | p-value | Adjusted-All |            |         |
|--------------------------------------------|------------|------------|----------------|------------|---------|--------------|------------|---------|
|                                            | OR         | 95%CI      | OR             | 95%CI      |         | OR           | 95%CI      | p-value |
| <b>Ever watched MTV Shuga, 2018/19</b>     |            |            |                |            |         |              |            |         |
| No                                         | 1          |            |                |            |         | 1            |            |         |
| Yes                                        | 2.01       | 1.55 -2.62 |                |            |         | 2.06         | 1.57 -2.70 | <0.001  |
| <b>Age</b>                                 | 1.12       | 1.08-1.16  | 1.12           | 1.08-1.17  | <0.001  | 1.11         | 1.06-1.17  | <0.001  |
| <b>Currently in school</b>                 |            |            |                |            |         |              |            |         |
| No                                         | 1          |            | 1              |            |         | 1            |            |         |
| Yes                                        | 0.6        | 0.47 -0.76 | 0.59           | 0.46 -0.75 | <0.001  | 0.89         | 0.65 -1.23 | 0.488   |
| <b>Socio-economic status, 2018</b>         |            |            |                |            |         |              |            |         |
| Low                                        | 1          |            | 1              |            |         | 1            |            |         |
| Middle                                     | 0.99       | 0.71 -1.39 | 0.96           | 0.68 -1.35 |         | 1.01         | 0.71 -1.44 |         |
| High                                       | 1.13       | 0.81 -1.58 | 1.05           | 0.75 -1.47 | 0.744   | 1.11         | 0.78 -1.58 | 0.699   |
| <b>Urban or rural</b>                      |            |            |                |            |         |              |            |         |
| Rural                                      | 1          |            | 1              |            |         | 1            |            |         |
| Peri-urban/urban                           | 0.98       | 0.79 -1.22 | 0.93           | 0.75 -1.16 | 0.525   | 0.92         | 0.73 -1.15 | 0.459   |
| <b>Invited or received DREAMS, 2017/18</b> |            |            |                |            |         |              |            |         |
| No                                         | 1          |            | 1              |            |         | 1            |            |         |
| Yes                                        | 0.89       | 0.73 -1.10 | 0.88           | 0.71 -1.08 | 0.212   | 0.99         | 0.79 -1.23 | 0.897   |
