# Supplementary material for: Evaluating use of mass-media communication intervention ‘MTV-Shuga’ on increased awareness and demand for HIV and sexual health services by adolescent girls and young women in South Africa: an observational study
Source: PubMed Central journal article supplement (PMC10201230; doi:10.1136/bmjopen-2022-062804), 2023-05-18
Supplement: bmjopen-2022-062804supp002.pdf [file bmjopen-2022-062804supp002.pdf]

**Supplementary Table 2 Exposure to MTV Shuga and contraception uptake in the nested cohort of AGYW aged 13-22 (n=2184)**

|                                            | Unadjusted |           | Shuga adjusted |           | p-value | Adjusted-All |           |         |
|--------------------------------------------|------------|-----------|----------------|-----------|---------|--------------|-----------|---------|
|                                            | OR         | 95%CI     | OR             | 95%CI     |         | OR           | 95%CI     | p-value |
| <b>Ever watched MTV Shuga, 2018/19</b>     |            |           |                |           |         |              |           |         |
| No                                         | 1          |           |                |           |         | 1            |           |         |
| Yes                                        | 1.92       | 1.37-2.68 |                |           |         | 2.08         | 1.45-2.98 | <0.001  |
| <b>Age</b>                                 | 1.26       | 1.19-1.33 | 1.27           | 1.20-1.34 | <0.001  | 1.32         | 1.24-1.42 | <0.001  |
| <b>Currently in school</b>                 |            |           |                |           |         |              |           |         |
| No                                         | 1          |           | 1              |           |         | 1            |           |         |
| Yes                                        | 0.6        | 0.44-0.83 | 0.59           | 0.43-0.82 | 0.001   | 1.7          | 1.13-2.55 | 0.01    |
| <b>Socio-economic status, 2018</b>         |            |           |                |           |         |              |           |         |
| Low                                        | 1          |           | 1              |           |         | 1            |           |         |
| Middle                                     | 0.79       | 0.51-1.22 | 0.76           | 0.49-1.19 |         | 0.8          | 0.51-1.28 |         |
| High                                       | 0.86       | 0.55-1.34 | 0.8            | 0.51-1.24 | 0.489   | 0.83         | 0.52-1.32 | 0.646   |
| <b>Urban or rural</b>                      |            |           |                |           |         |              |           |         |
| Rural                                      | 1          |           | 1              |           |         | 1            |           |         |
| Peri-urban/urban                           | 0.91       | 0.68-1.24 | 0.86           | 0.64-1.17 | 0.345   | 0.89         | 0.64-1.24 | 0.49    |
| <b>Invited or received DREAMS, 2017/18</b> |            |           |                |           |         |              |           |         |
| No                                         | 1          |           | 1              |           |         | 1            |           |         |
| Yes                                        | 0.84       | 0.63-1.11 | 0.83           | 0.62-1.10 | 0.191   | 1.04         | 0.76-1.42 | 0.813   |
