# Supplementary material for: Evaluating use of mass-media communication intervention ‘MTV-Shuga’ on increased awareness and demand for HIV and sexual health services by adolescent girls and young women in South Africa: an observational study
Source: PubMed Central journal article supplement (PMC10201230; doi:10.1136/bmjopen-2022-062804), 2023-05-18
Supplement: bmjopen-2022-062804supp004.pdf [file bmjopen-2022-062804supp004.pdf]

**Supplementary Table 4 Exposure to MTV Shuga and HIV testing in the nested cohort of AGYW aged 13-22 (n=2184)**

|                                            | Unadjusted |           | Shuga adjusted |           | p-value | Adjusted-All |           |         |
|--------------------------------------------|------------|-----------|----------------|-----------|---------|--------------|-----------|---------|
|                                            | OR         | 95%CI     | OR             | 95%CI     |         | OR           | 95%CI     | p-value |
| <b>Ever watched MTV Shuga, 2018/19</b>     |            |           |                |           |         |              |           |         |
| No                                         | 1          |           |                |           |         | 1            |           |         |
| Yes                                        | 0.93       | 0.71-1.21 |                |           |         | 1.02         | 0.77-1.36 | 0.885   |
| <b>Age</b>                                 | 1.3        | 1.25-1.35 | 1.3            | 1.24-1.35 | <0.001  | 1.3          | 1.24-1.37 | <0.001  |
| <b>Currently in school</b>                 |            |           |                |           |         |              |           |         |
| No                                         | 1          |           | 1              |           |         | 1            |           |         |
| Yes                                        | 0.37       | 0.28-0.48 | 0.37           | 0.28-0.48 | 0       | 1.07         | 0.74-1.53 | 0.726   |
| <b>Socio-economic status, 2018</b>         |            |           |                |           |         |              |           |         |
| Low                                        | 1          |           | 1              |           |         | 1            |           |         |
| Middle                                     | 0.67       | 0.48-0.94 | 0.67           | 0.48-0.95 |         | 0.71         | 0.49-1.02 |         |
| High                                       | 0.58       | 0.41-0.81 | 0.58           | 0.41-0.81 | 0.007   | 0.6          | 0.41-0.86 | 0.018   |
| <b>Urban or rural</b>                      |            |           |                |           |         |              |           |         |
| Rural                                      | 1          |           | 1              |           |         | 1            |           |         |
| Peri-urban/urban                           | 0.84       | 0.68-1.03 | 0.84           | 0.69-1.04 | 0.104   | 0.89         | 0.71-1.11 | 0.298   |
| <b>Invited or received DREAMS, 2017/18</b> |            |           |                |           |         |              |           |         |
| No                                         | 1          |           | 1              |           |         | 1            |           |         |
| Yes                                        | 0.84       | 0.69-1.02 | 0.84           | 0.69-1.02 | 0.081   | 0.98         | 0.79-1.23 | 0.89    |
