# Supplementary material for: Evaluating use of mass-media communication intervention ‘MTV-Shuga’ on increased awareness and demand for HIV and sexual health services by adolescent girls and young women in South Africa: an observational study
Source: HighWire-hosted journal article supplement (doi:10.1136/bmjopen-2022-062804), 2023-05-01
Supplement: bmjopen-2022-062804supp005_data_supplement.pdf [file bmjopen-2022-062804supp005_data_supplement.pdf]

**Supplementary Table 5: Exposure to MTV Shuga with HIV prevention and SRHR awareness and uptake in the cross-sectional analysis of AGYW aged 12-24 (n=4127)**

|                                    | aOR (95% Confidence Interval) | P-value |
|------------------------------------|-------------------------------|---------|
| <b>District</b>                    |                               |         |
| City of Johannesburg               | 1                             |         |
| Ekurhuleni                         | 0.66 (0.47-0.91)              | 0.013   |
| eThekwini                          | 0.78 (0.54-1.13)              | 0.186   |
| <b>Age group</b>                   |                               |         |
| 12-14                              | 1                             |         |
| 15-19                              | 1.75 (0.35-8.84)              | 0.499   |
| 20-24                              | 1.60 (0.32-8.07)              | 0.570   |
| <b>Highest education level</b>     |                               |         |
| Grade R to 7                       | 1                             |         |
| No schooling                       | 3.84 (1.05-14.02)             | 0.041   |
| Grade 8 to 12                      | 3.17 (0.93-10.77)             | 0.065   |
| Complete or incomplete tertiary    | 6.52 (1.90-22.33)             | 0.003   |
| <b>Ever had sex with a boy/man</b> |                               |         |
| No                                 | 1                             |         |
| Yes                                | 0.67 (0.32-1.40)              | 0.286   |
| <b>Away from home</b>              |                               |         |
| No                                 | 1                             |         |
| Yes                                | 1.48 (0.93-2.37)              | 0.099   |
| <b>PrEP awareness</b>              |                               |         |
| No                                 | 1                             |         |
| Yes                                | 1.71 (1.20-2.43)              | 0.003   |
| <b>Contraception use</b>           |                               |         |
| No                                 | 1                             |         |
| Yes                                | 0.95 (0.74-1.23)              | 0.718   |
| <b>Condom use at last sex</b>      |                               |         |
| No                                 | 1                             |         |
| Yes                                | 1.19 (0.92-1.55)              | 0.183   |
| <b>HIV test (self-report)</b>      |                               |         |
| No                                 | 1                             |         |
| Yes                                | 0.88 (0.63-1.24)              | 0.471   |
